# Supplementary material for: Electronic structure manipulation of graphene dots for effective hydrogen evolution from photocatalytic water decomposition
Source: Royal Society of Chemistry journal article supplement (doi:10.1039/c8nr02441c), 2018-01-01
Supplement: c8nr02441c1.pdf [file c8nr02441c1.pdf]

## Electronic Supplementary Information

# Electronic Structure Manipulation of Graphene Dots for Effective Hydrogen Evolution from Photocatalytic Water Decomposition

Ba-Son Nguyen,<sup>a</sup> Yuan-Kai Xiao,<sup>a</sup> Chun-Yan Shih,<sup>a</sup> Van-Can Nguyen,<sup>a</sup> Wei-Yang Chou,<sup>b</sup> and Hsisheng Teng<sup>\*a,c</sup>

<sup>a</sup>Department of Chemical Engineering and Research Center for Energy Technology and Strategy, National Cheng Kung University, Tainan 70101, Taiwan

<sup>b</sup>Department of Photonics, National Cheng Kung University, Tainan 70101, Taiwan

<sup>c</sup>Hierarchical Green-Energy Materials (Hi-GEM) Research Center, National Cheng Kung University, Tainan 70101, Taiwan

\*To whom correspondence should be addressed. E-mail: [hteng@mail.ncku.edu.tw](mailto:hteng@mail.ncku.edu.tw), Tel: 886-6-2385371, Fax: 886-6-2344496

### Supporting information for:

- (1) TEM images of A-GODs and A-SGODs;
- (2) Full-range XPS spectra of GO-dots without hydrothermal NH<sub>3</sub> treatment;
- (3) C 1s XPS spectra of GO-dots without hydrothermal NH<sub>3</sub> treatment;
- (4) N 1s and S 2s XPS spectra of GO-dots without hydrothermal NH<sub>3</sub> treatment;
- (5) Quantitative XPS data of GO-dots without hydrothermal NH<sub>3</sub> treatment;
- (6) Possible quaternary N formation mechanism;
- (7) PL spectra of GO-dots;
- (8) UPS analysis of GO-dots;
- (9) Activity variation of A-SNGODs in H<sub>2</sub> production under visible irradiation for 144 h.

## 1. TEM images of A-GODs and A-SGODs

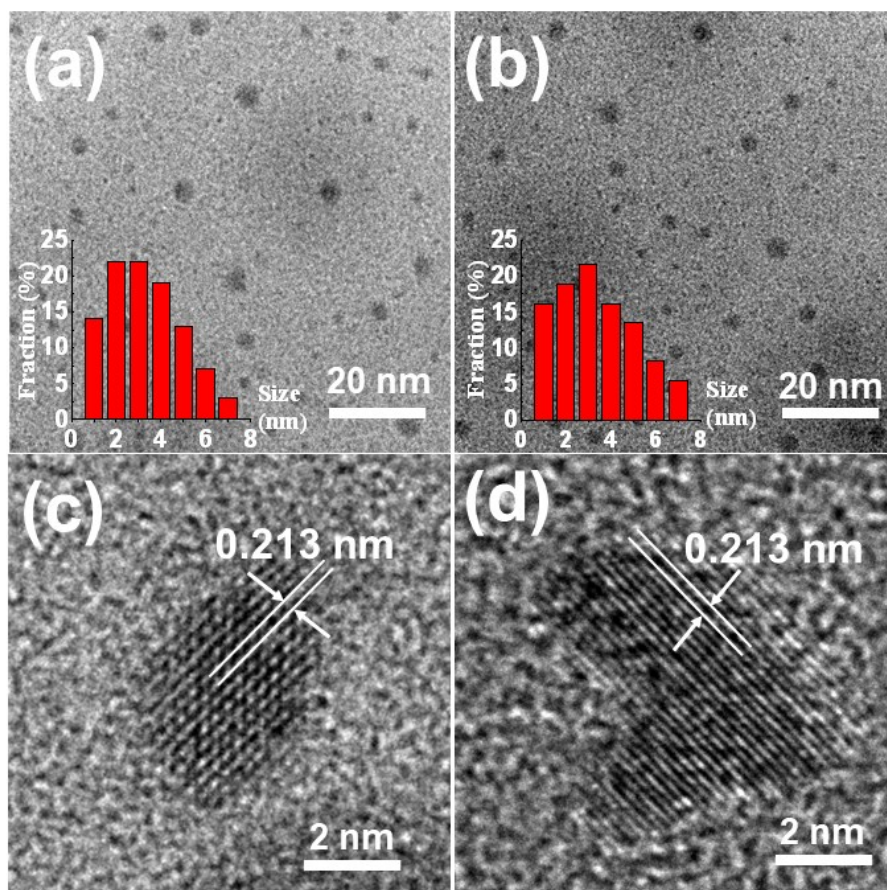

**Fig. S1** TEM images of (a) A-GODs and (b) A-SGODs, with the insets showing the size-distribution histograms. HRTEM images of the (c) A-GOD and (d) A-SGOD particles, showing lattice fringes with a spacing of 0.213 nm, which corresponds to the graphene  $\{1\bar{1}00\}$  d-spacing.

## 2. Full-range XPS spectra of GO-dots without hydrothermal $\text{NH}_3$ treatment

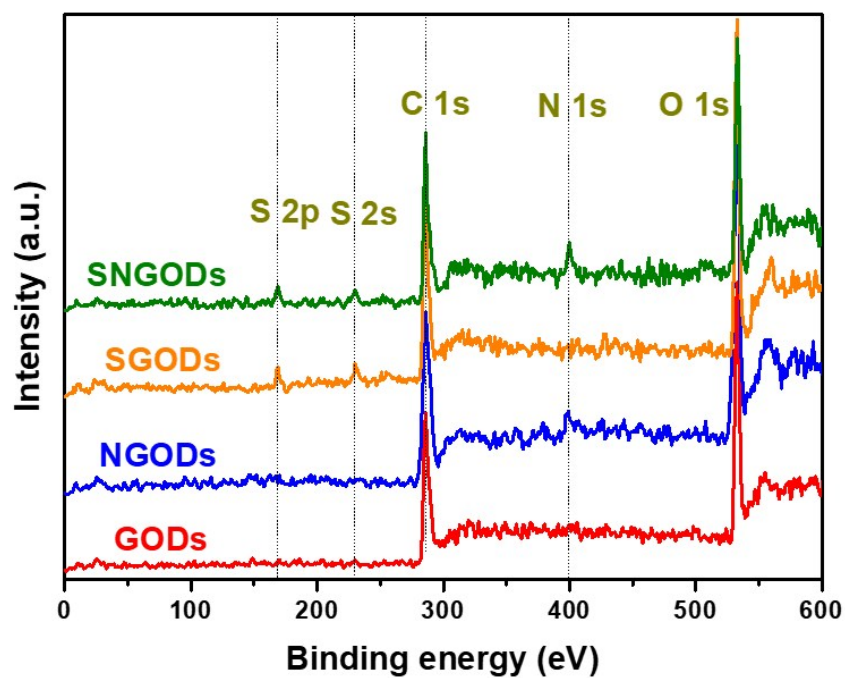

**Fig. S2** Full-range XPS spectra of GODs, NGODs, SGODs, and SNGODs.

### 3. C 1s XPS spectra of GO-dots without hydrothermal $\text{NH}_3$ treatment

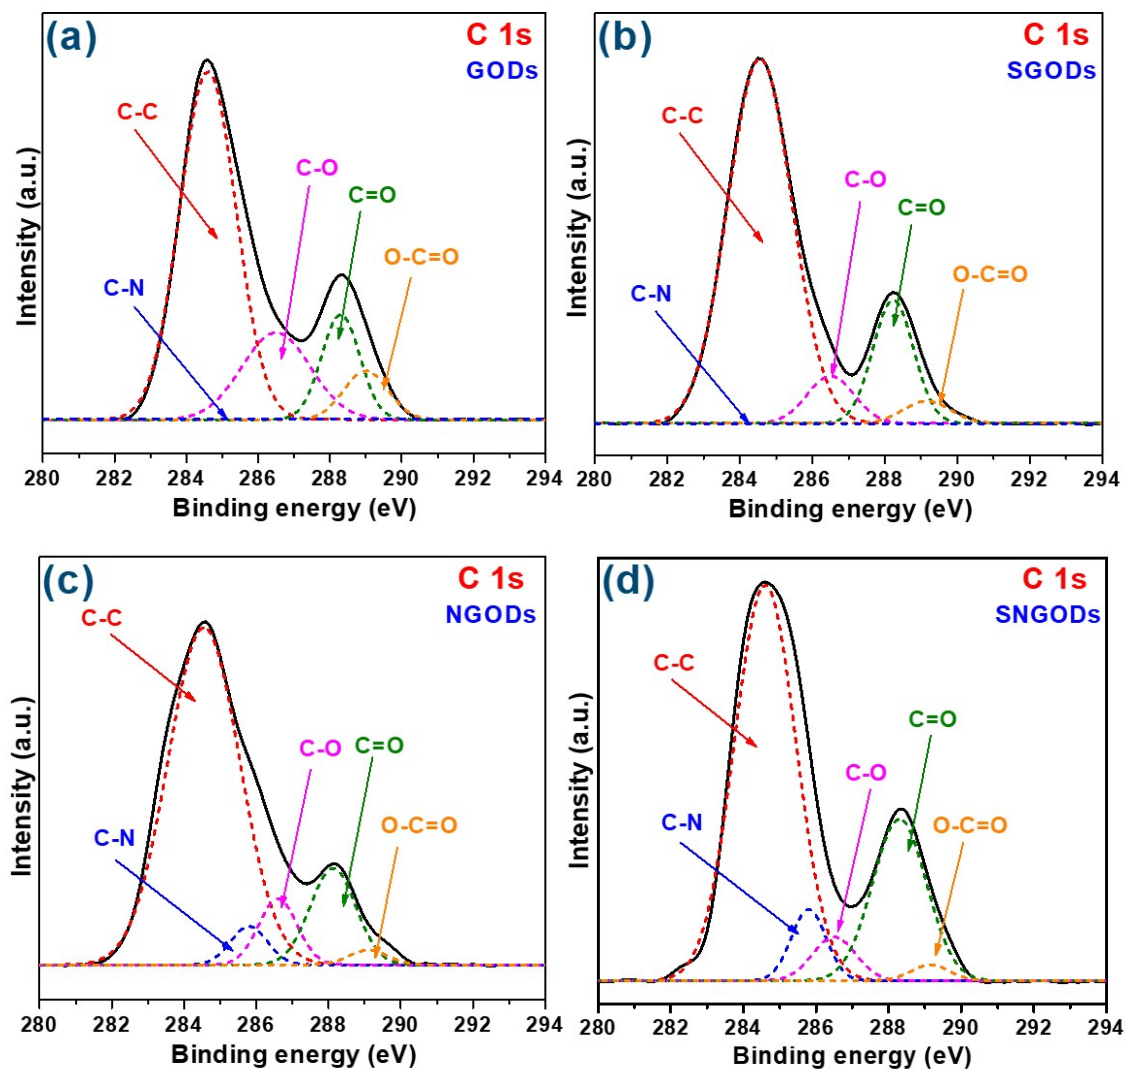

**Fig. S3** C 1s XPS spectra: (a) GODs; (b) SGODs; (c) NGODs; (d) SNGODs.

#### 4. N 1s and S 2s XPS spectra of GO-dots without hydrothermal NH<sub>3</sub> treatment

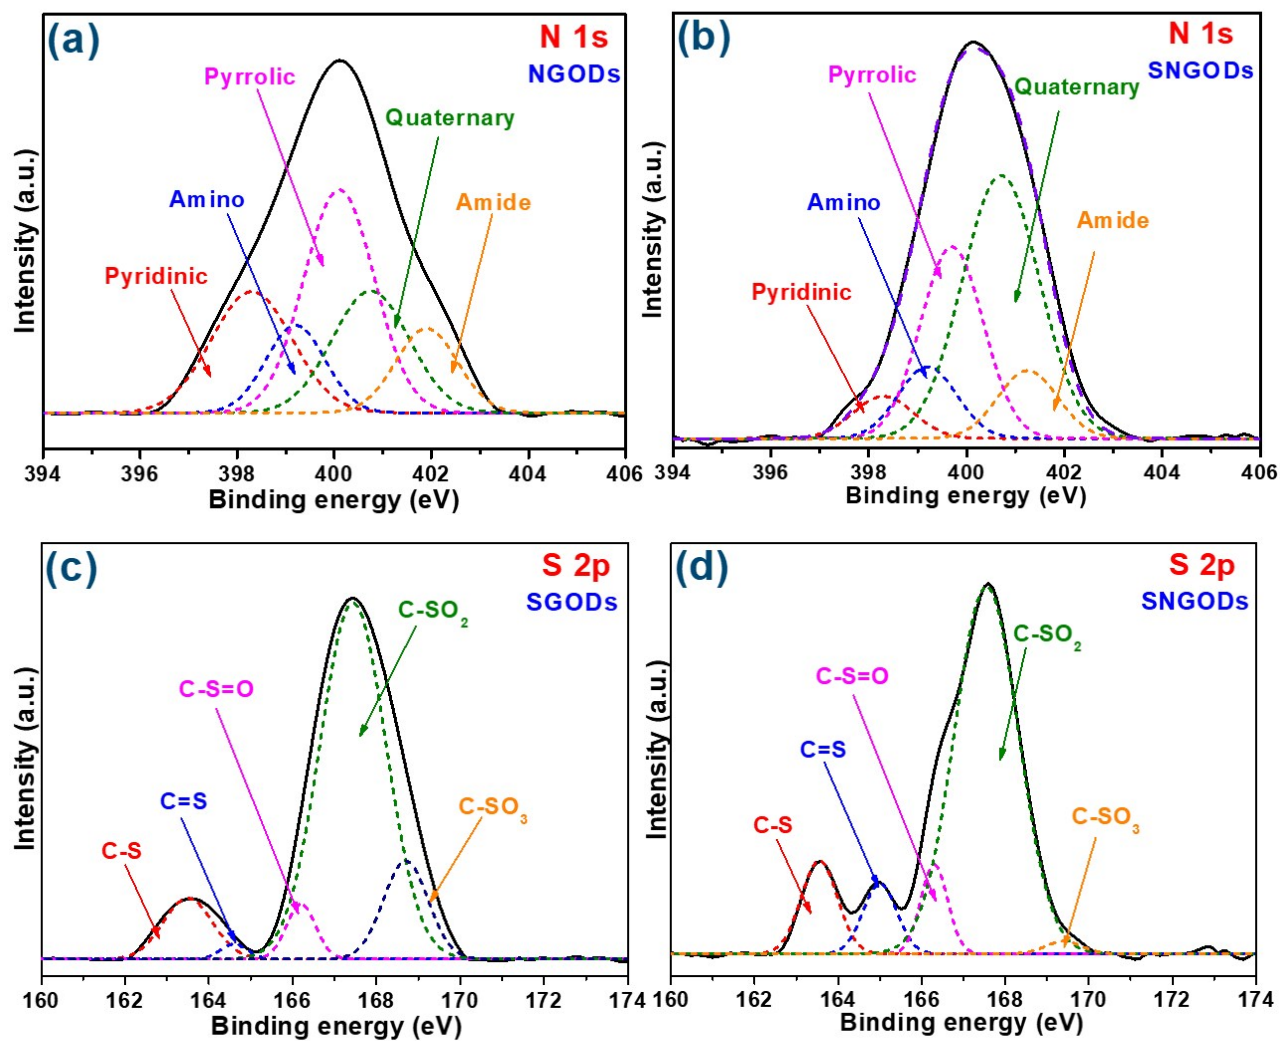

**Fig. S4** N 1s XPS spectra: (a) NGODs; (b) SNGODs. S 2p XPS spectra: (c) SGODs; (d) SNGODs.

## 5. Quantitative XPS data of GO-dots without hydrothermal NH<sub>3</sub> treatment

**Table S1** Atomic ratios (O 1s)/(C 1s), (N 1s)/(C 1s), (S 2p/C 1s), and (S 2s/C 1s) determined from the full-range XPS spectra (Fig. S2), carbon bonding compositions determined from the C 1s XPS spectra (Fig. S3), nitrogen functionality compositions determined from the N 1s XPS spectra (Fig. S4(a,b)), and sulfur functionality compositions determined from the S 2p (2s) XPS spectra (Fig. S4(c,d)) for GODs, SGODs, NGODs, and SNGODs.

|        | Atomic ratio | Carbon bonding composition (%) |     |     |     |       |
|--------|--------------|--------------------------------|-----|-----|-----|-------|
|        | O 1s / C 1s  | C–C                            | C–N | C–O | C=O | O–C=O |
| GODs   | 64           | 62                             | —   | 19  | 13  | 6.8   |
| SGODs  | 59           | 74                             | —   | 7.0 | 16  | 3.3   |
| NGODs  | 58           | 70                             | 4.2 | 8.5 | 16  | 1.8   |
| SNGODs | 59           | 64                             | 6.5 | 5.0 | 23  | 1.6   |

  

|        | Atomic ratio | Nitrogen functionality composition (% of C 1s) |       |          |            |       |
|--------|--------------|------------------------------------------------|-------|----------|------------|-------|
|        | N 1s / C 1s  | Pyridine                                       | Amino | Pyrrolic | Quaternary | Amide |
| NGODs  | 6.37         | 1.41                                           | 0.62  | 2.36     | 1.35       | 0.62  |
| SNGODs | 7.68         | 0.45                                           | 0.75  | 2.24     | 3.51       | 0.73  |

  

|        | Atomic ratio            | Sulfur functionality composition (% of C1s) |      |       |                   |                   |
|--------|-------------------------|---------------------------------------------|------|-------|-------------------|-------------------|
|        | S 2p / C 1s (S 2s/C 1s) | C-S-C                                       | C=S  | C-S=O | C-SO <sub>2</sub> | C-SO <sub>3</sub> |
| SGODs  | 5.9 (5.6)               | 0.55                                        | 0.12 | 0.26  | 4.2               | 0.48              |
| SNGODs | 6.2 (6.1)               | 0.68                                        | 0.48 | 0.48  | 4.7               | 0.09              |

## 6. Possible quaternary N formation mechanism

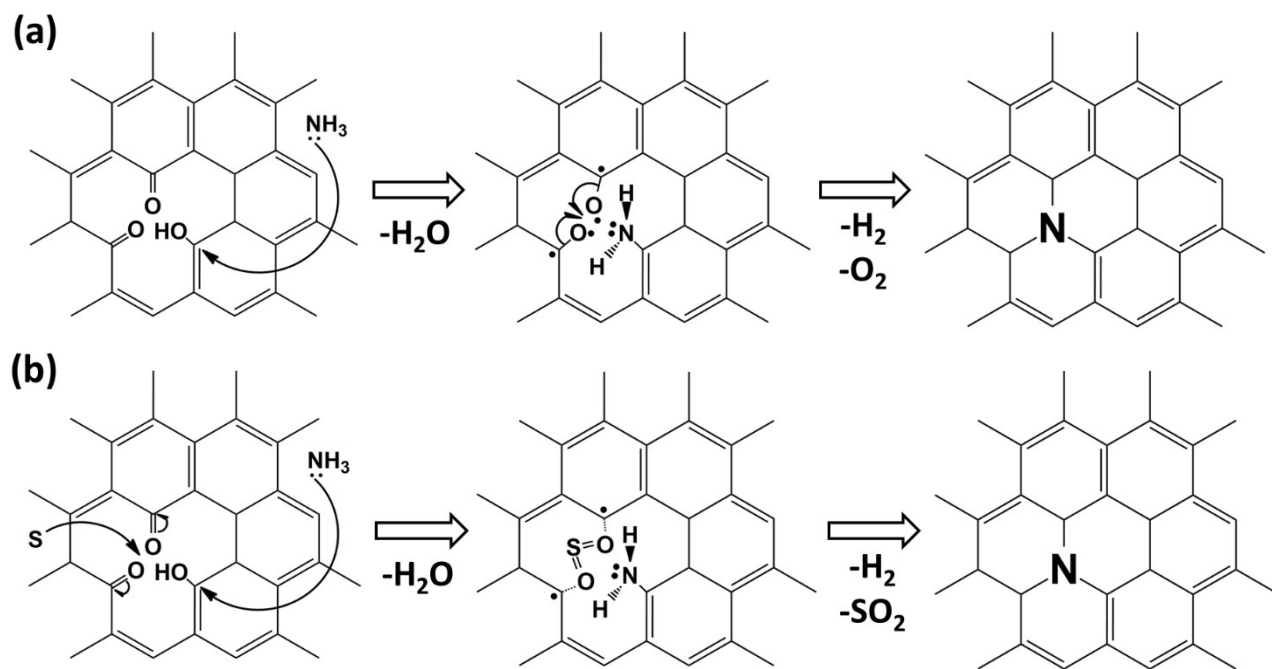

**Scheme S1** The possible mechanisms for the formation of quaternary N on the GO surface under annealing ammonia treatment: (a) annealing without sulfur; (b) annealing with sulfur. The presence of sulfur facilitates the formation of the quaternary N groups.

## 7. PL spectra of GO-dots

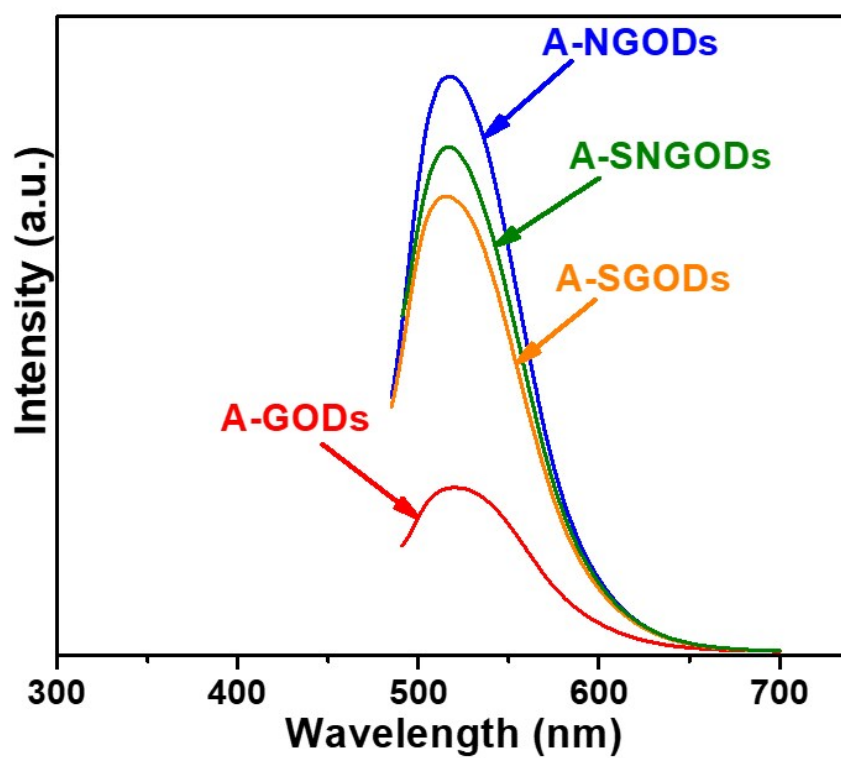

**Fig. S5** The photoluminescence spectra of the aqueous solutions of AGODs, A-SGODs, A-NGODs, and A-SNGODs excited at 470 nm.

## 8. UPS analysis of GO-dots

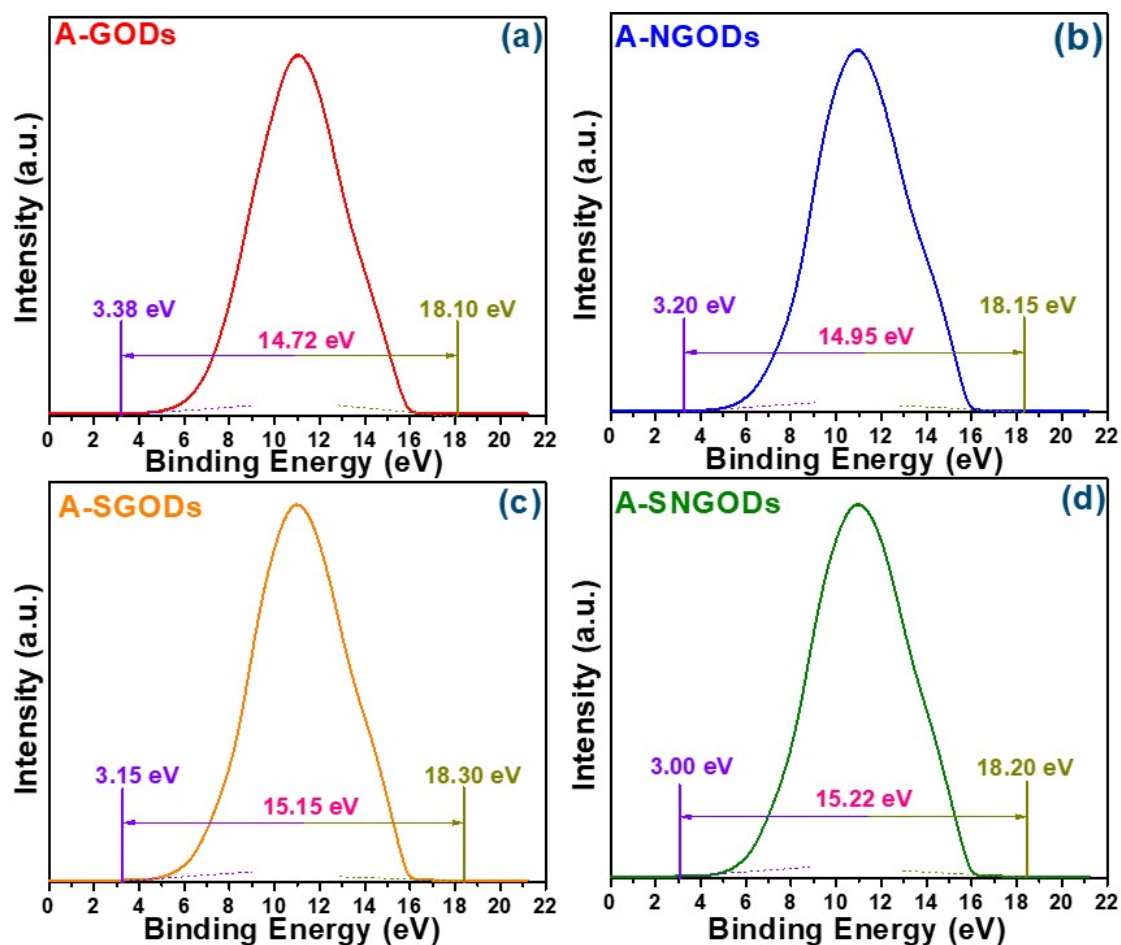

**Fig. S6** UPS spectra of the photocatalysts: (a) A-GODs; (b) A-NGODs; (c) A-SGODs; (d) A-SNGODs. The VBM levels with respect to the Fermi levels were determined from the intercepts of the extrapolated straight lines (blue dashed line) on the abscissa at low binding energy. The intersections of the tangent (red dashed line) with the abscissa at high binding energy give the secondary electron onset binding energy. The UPS widths (black lines) can be determined by these two intercept binding energies, and the VBM levels can be calculated by subtracting these widths from the excitation energy (21.2 eV).

## 9. Activity variation of A-SNGODs in H<sub>2</sub> production under visible irradiation for 144 h

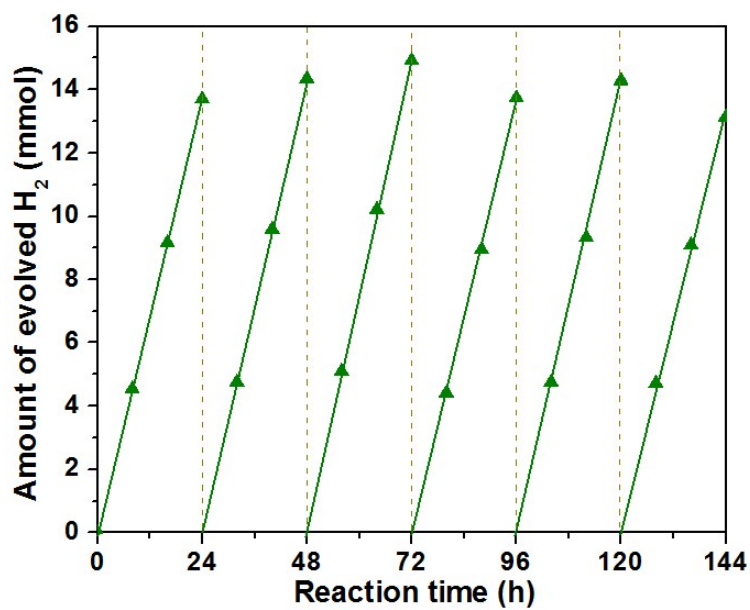

**Fig. S7** Time course of H<sub>2</sub> production from the 10 vol% triethanolamine aqueous solution containing the 3 wt% Pt-deposited on 0.4 g A-SNGODs under visible light (420–800 nm) irradiation of intensity 38 mW cm<sup>-2</sup> over a period of 144 h.
